# Supplementary material
Source: publisher figshare collection journal article supplement (https://sage.figshare.com/ndownloader/files/17832725)
Supplement: Supplementary file 1 [file 17832725]

## Excluded studies

We excluded 10 studies after full-text retrieval <sup>1-10</sup>. Rationales are provided in Table 1.

*Table 1 Characteristics of excluded studies*

| Study                             | Reason for exclusion                                                                                            |
|-----------------------------------|-----------------------------------------------------------------------------------------------------------------|
| Dannhauser, et al. <sup>8</sup>   | Intervention arm was sequential design                                                                          |
| Fogarty, et al. <sup>5</sup>      | Global cognitive function measures not reported                                                                 |
| Hagovska and Nagyova <sup>2</sup> | Not all aspects of the intervention arm were delivered as combined simultaneous cognitive and physical activity |
| Hagovska, et al. <sup>1</sup>     | Not all aspects of the intervention arm were delivered as combined simultaneous cognitive and physical activity |
| Hughes, et al. <sup>6</sup>       | Diagnostic criteria not specified                                                                               |
| Lam, et al. <sup>7</sup>          | Some of the sample was recruited from residential care and not analysed separately                              |
| Mirelman, et al. <sup>4</sup>     | Global cognitive function measures not reported                                                                 |
| Styliadis, et al. <sup>9</sup>    | Combined intervention arm was sequential design                                                                 |
| Sungkarat, et al. <sup>3</sup>    | Global cognitive function measures not reported                                                                 |
| Wei and Ji <sup>10</sup>          | Sample recruited from residential care                                                                          |

## References

- Hagovska M, Takáč P, Dzvoník O. Effect of a combining cognitive and balanced training on the cognitive, postural and functional status of seniors with a mild cognitive deficit in a randomized, controlled trial. *European journal of physical and rehabilitation medicine* 2016;52(1):101-09.
- Hagovska M, Nagyova I. The transfer of skills from cognitive and physical training to activities of daily living: a randomised controlled study. *European journal of ageing* 2017;14(2):133-42.
- Sungkarat S, Boripuntakul S, Chattipakorn N, et al. Effects of tai chi on cognition and fall risk in older adults with mild cognitive impairment: a randomized controlled trial. *Journal of the American Geriatrics Society* 2017;65(4):721-27.
- Mirelman A, Rochester L, Maidan I, et al. Addition of a non-immersive virtual reality component to treadmill training to reduce fall risk in older adults (V-TIME): a randomised controlled trial. *The Lancet* 2016;388(10050):1170-82.
- Fogarty JN, Murphy KJ, McFarlane B, et al. Taoist Tai Chi® and memory intervention for individuals with mild cognitive impairment. *Journal of aging and physical activity* 2016;24(2):169-80.
- Hughes TF, Flatt JD, Fu B, et al. Interactive video gaming compared with health education in older adults with mild cognitive impairment: a feasibility study. *International journal of geriatric psychiatry* 2014;29(9):890-98.
- Lam L, Chan W, Kwok T, et al. Effectiveness of Tai Chi in maintenance of cognitive and functional abilities in mild cognitive impairment: a randomised controlled trial. *Hong Kong Med J* 2014;20(3 Suppl 3):20-3.
- Dannhauser TM, Cleverley M, Whitfield TJ, et al. A complex multimodal activity intervention to reduce the risk of dementia in mild cognitive impairment—ThinkingFit: pilot and feasibility study for a randomized controlled trial. *BMC psychiatry* 2014;14(1):129.
- Styliadis C, Kartsidis P, Paraskevopoulos E, et al. Neuroplastic effects of combined computerized physical and cognitive training in elderly individuals at risk for dementia: an eLORETA controlled study on resting states. *Neural plasticity* 2015;2015.
- Wei X-h, Ji L-l. Effect of handball training on cognitive ability in elderly with mild cognitive impairment. *Neuroscience letters* 2014;566:98-101.
